# Supplementary material for: Photoelectrocatalytic hydrogen evolution reaction stimulated by the surface plasmon resonance effect of copper and silver surrounded with MoS2
Source: Royal Society of Chemistry journal article supplement (doi:10.1039/d3ra04357f), 2023-01-01
Supplement: d3ra04357f1.pdf [file d3ra04357f1.pdf]

## Supporting information

### Photoelectrocatalytic Hydrogen Evolution Reaction Stimulated by Surface Plasmon Resonance Effect of Copper and Silver Surrounded with MoS<sub>2</sub>

*Yuanyuan Tian\**, *Chengnan Qi*, *Ruihua Zhou*, *Dan Li*, *Tao Han*

College of Materials Industry, Shanxi College of Technology, Shuozhou Shanxi Province, 036000, China.

Correspondence and requests for materials should be addressed to Yuanyuan Tian (email: [tyy20220418@163.com](mailto:tyy20220418@163.com))

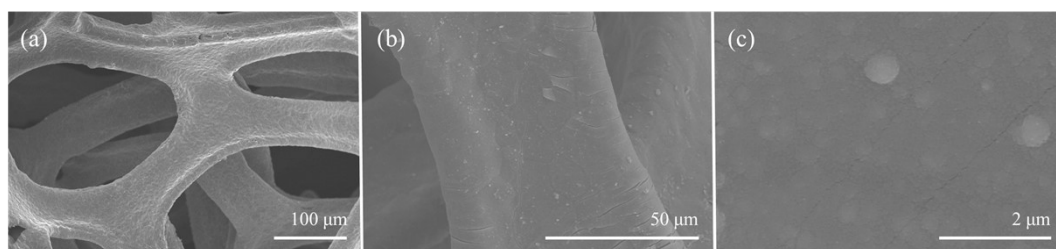

Figure S1. SEM images of (a) Cu foam, (b) MoS<sub>2</sub>@Cu foam, (c) corresponding higher-magnification of MoS<sub>2</sub>@Cu foam.

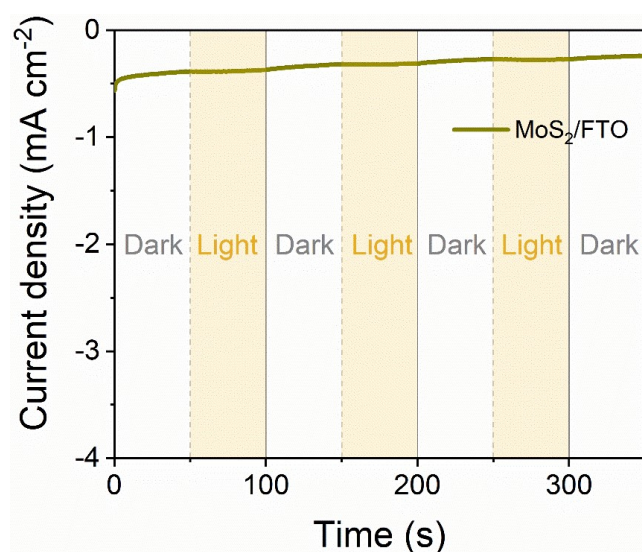

Figure S2. On-off J-t curves of MoS<sub>2</sub>/FTO. The potential bias is -200mV.

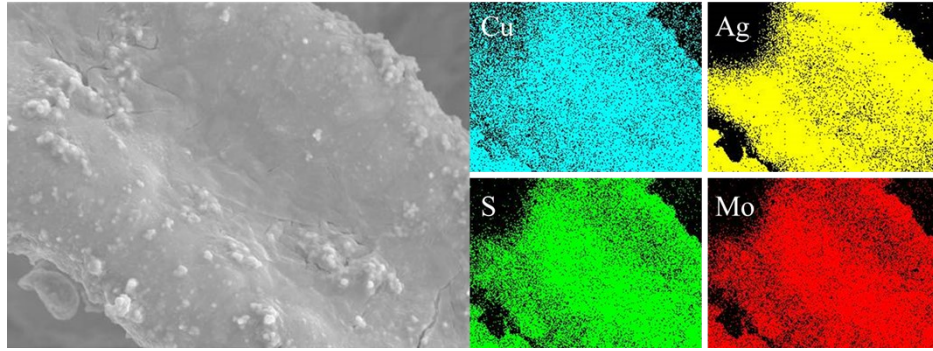

Figure S3. EDS mapping images of  $\text{MoS}_2@\text{Ag-Cu}$  foam after long-term cyclic testing.

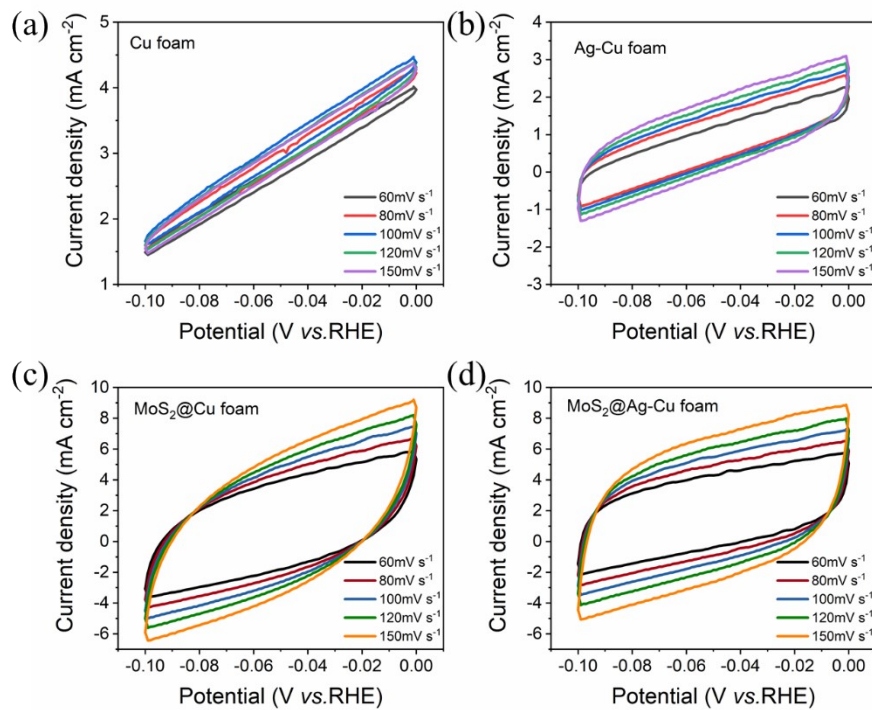

Figure S4. Electrochemical double-layer capacitance (EDLC) measurements of (a) Cu foam, (b) Ag-Cu foam, (c)  $\text{MoS}_2@\text{Cu}$  foam and (d)  $\text{MoS}_2@\text{Ag-Cu}$  foam, respectively. The current densities at 0.05 V vs. RHE and the corresponding scanning rates were used to calculate the EDLC value.

Table S1 The values of photo response current ( $\Delta J$ ), overpotentials ( $\eta$ ), Tafel, ECSA for Cu foam, Ag-Cu foam, MoS<sub>2</sub>@ Cu foam, and MoS<sub>2</sub>@Ag-Cu foam.

| Samples<br>Values                                     | Cu foam | Ag-Cu foam | MoS <sub>2</sub> @ Cu<br>foam | MoS <sub>2</sub> @Ag-Cu<br>foam |
|-------------------------------------------------------|---------|------------|-------------------------------|---------------------------------|
| $\Delta J$ (mA cm <sup>2</sup> , Light/Dark) · Fig.4b | 0.091   | 0.143      | 0.137                         | 0.262                           |
| $\eta$ (vs. 10mA cm <sup>-2</sup> , V) · Fig.6a       | 0.370   | 0.278      | 0.223                         | 0.218                           |
| $\eta$ (vs. 50mA cm <sup>-2</sup> , V) · Fig.6a       | 0.468   | 0.353      | 0.270                         | 0.253                           |
| Tafel (mV dec <sup>-1</sup> ) · Fig.6b                | 153     | 115        | 68.5                          | 54.2                            |
| ECSA (mF) · Fig.6c                                    | 1.8     | 11.2       | 38.5                          | 53.2                            |
